# Supplementary material for: Variability in 14 C contents of soil organic matter at the plot and regional scale across climatic and geologic gradients
Source: Copernicus journal article supplement (doi:10.5194/bg-13-3427-2016), 2016-06-14
Supplement: Supplementary file 1 [file bg-13-3427-2016-supplement.zip]

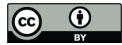

## *Supplement of*

# **Variability in $^{14}\text{C}$ contents of soil organic matter at the plot and regional scale across climatic and geologic gradients**

**Tessa Sophia van der Voort et al.**

*Correspondence to:* Tessa Sophia van der Voort ([tessa.vandervoort@erdw.ethz.ch](mailto:tessa.vandervoort@erdw.ethz.ch))

- [bg-13-3427-2016-supplement-title-page.pdf](#)
- [bg-2015-649-supplement.pdf](#)
- [data\\_supplement.xlsx](#)

The copyright of individual parts of the supplement might differ from the CC-BY 3.0 licence.
