# Supplementary material for: Variability in 14 C contents of soil organic matter at the plot and regional scale across climatic and geologic gradients
Source: Copernicus journal article supplement (doi:10.5194/bg-13-3427-2016), 2016-06-14
Supplement: Supplementary file 2 [file bg-13-3427-2016-supplement.zip]

**Supplement Table S1.** Overview of WSL LWF sampling locations and main compositional parameters (Walthert et al., 2003).

|    | Soil type <sup>1</sup> | Location <sup>1</sup> | Sand <sub>0-5 cm</sub> (%) <sup>1</sup> | Silt <sub>0-5 cm</sub> (%) <sup>1</sup> | Clay <sub>0-5 cm</sub> (%) <sup>1</sup> | Total soil depth (cm) <sup>1</sup> | pH <sub>0-5 cm</sub> <sup>1</sup> | Bulk density <sub>0-5 cm</sub> <sup>1</sup> | C %   | SOC stocks <sub>0-5 cm</sub> (kgm <sup>-2</sup> ) <sup>1</sup> | SOC stocks <sub>organic layer</sub> (kgm <sup>-2</sup> ) <sup>1</sup> | MRT <sub>0-5 cm</sub> | CEC <sub>0-5 cm</sub> <sup>1,2</sup> |
|----|------------------------|-----------------------|-----------------------------------------|-----------------------------------------|-----------------------------------------|------------------------------------|-----------------------------------|---------------------------------------------|-------|----------------------------------------------------------------|-----------------------------------------------------------------------|-----------------------|--------------------------------------|
| 1  | Gleysol                | Alpthal               | 60                                      | 18                                      | 22                                      | 60-100                             | -                                 | 0.53                                        | -     | -                                                              | 0.07                                                                  | 71                    | 1225                                 |
| 2  | Podzol                 | Beatenberg            | -                                       | -                                       | -                                       | 65-100                             | 3.9                               | -                                           | -     | -                                                              | 2.80                                                                  | -                     | 340                                  |
| 3  | Cambisol               | Lausanne              | 62                                      | 25                                      | 13                                      | 300-320                            | -                                 | 1.14                                        | 3.94  | -                                                              | -                                                                     | -                     | -                                    |
| 4  | Calcisol               | Nationalpark          | 29                                      | 47                                      | 25                                      | 95-110                             | 7.7                               | 0.89                                        | 8.60  | 3.98                                                           | 1.31                                                                  | 115                   | 984                                  |
| 5  | Regosol                | Othmarsingen          | 65                                      | 25                                      | 10                                      | 190-220                            | 4.4                               | -                                           | -     | -                                                              | 0.55                                                                  | 67                    | 757                                  |
| 6  | Cambisol               | Bettlachstock         | 22                                      | 30                                      | 48                                      | 100-120                            | 6.9                               | 0.60                                        | 28.1  | 3.21                                                           | 0.24                                                                  | 67                    | 879                                  |
| 7  | Cambisol               | Isonne                | 59                                      | 27                                      | 14                                      | 120                                | -                                 | 0.34                                        | 6.51  | 4.76                                                           | 0.78                                                                  | 64.5                  | 405                                  |
| 8  | Stagnosol              | Jussy                 | -                                       | -                                       | -                                       | 100                                | -                                 | -                                           | -     | -                                                              | -                                                                     | -                     | -                                    |
| 9  | Calcisol               | Lens                  | 42                                      | 43                                      | 15                                      | 90-100                             | 7.1                               | 0.86                                        | 8.94  | 2.79                                                           | 0.64                                                                  | 11.5                  | 925                                  |
| 10 | Umbrisol               | Novaggio              | 69                                      | 18                                      | 14                                      | 150-180                            | 4.4                               | 1.37                                        | 4.17  | 5.90                                                           | 1.16                                                                  | 63                    | 465                                  |
| 11 | Cambisol               | Schaenis              | 43                                      | 35                                      | 22                                      | 220                                | 6.7                               | 0.92                                        | 12.69 | 2.85                                                           | 0.08                                                                  | 77                    | 947                                  |
| 12 | Regosol                | Visp                  | 31                                      | 53                                      | 16                                      | 140                                | 6.2                               | 0.31                                        | 6.41  | 1.94                                                           | 1.13                                                                  | 70                    | 796                                  |
| 13 | Stagnosol              | Vordemwald            | 43                                      | 47                                      | 11                                      | 300                                | 3.8                               | 0.67                                        | -     | 2.14                                                           | 1.26                                                                  | 76                    | 422                                  |

<sup>1</sup> (Walthert et al., 2003)<sup>2</sup> Cation Exchange Capacity (CEC) calculated in mmol/kg as obtained by NH<sub>4</sub>Cl extraction (Walthert et al., 2003) as described by Blume et al., (2002).

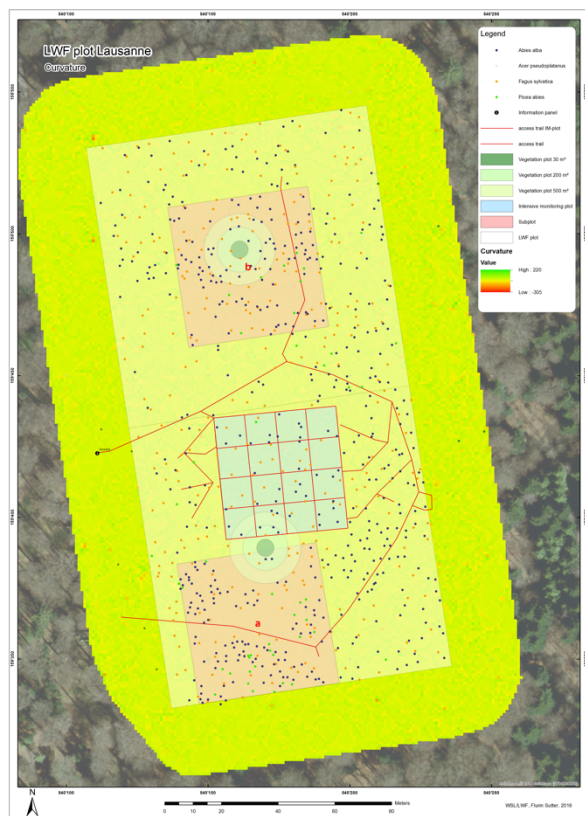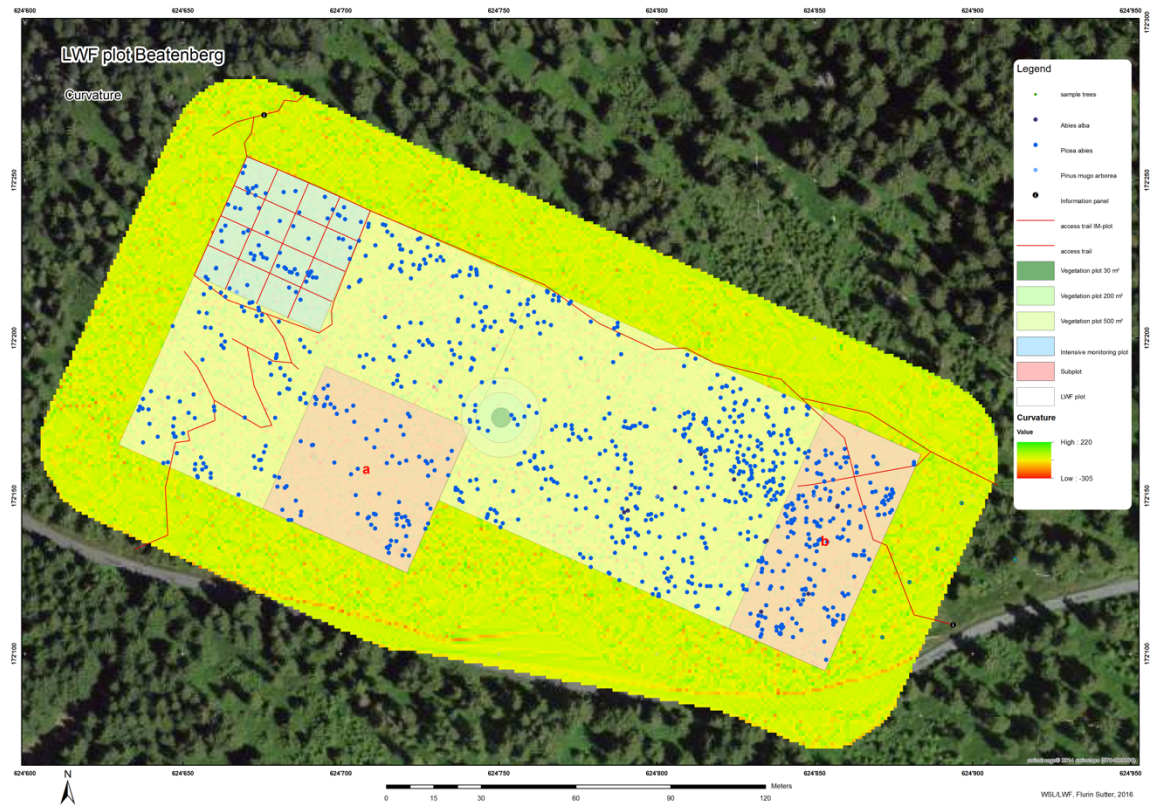

**Supplement Fig. S1.** Micro-topography expressed as curvature using Digital Terrain Mapping (DTM) of WSL LWF sites (a) Lausanne and (b) Beatenberg. Colourshading indicate that the curvature ( $\pm 360$  degrees) of soil topography in Lausanne is negligible whilst it is clearly present and variable in Beatenberg. Map courtesy of Flurin Sutter, WSL.

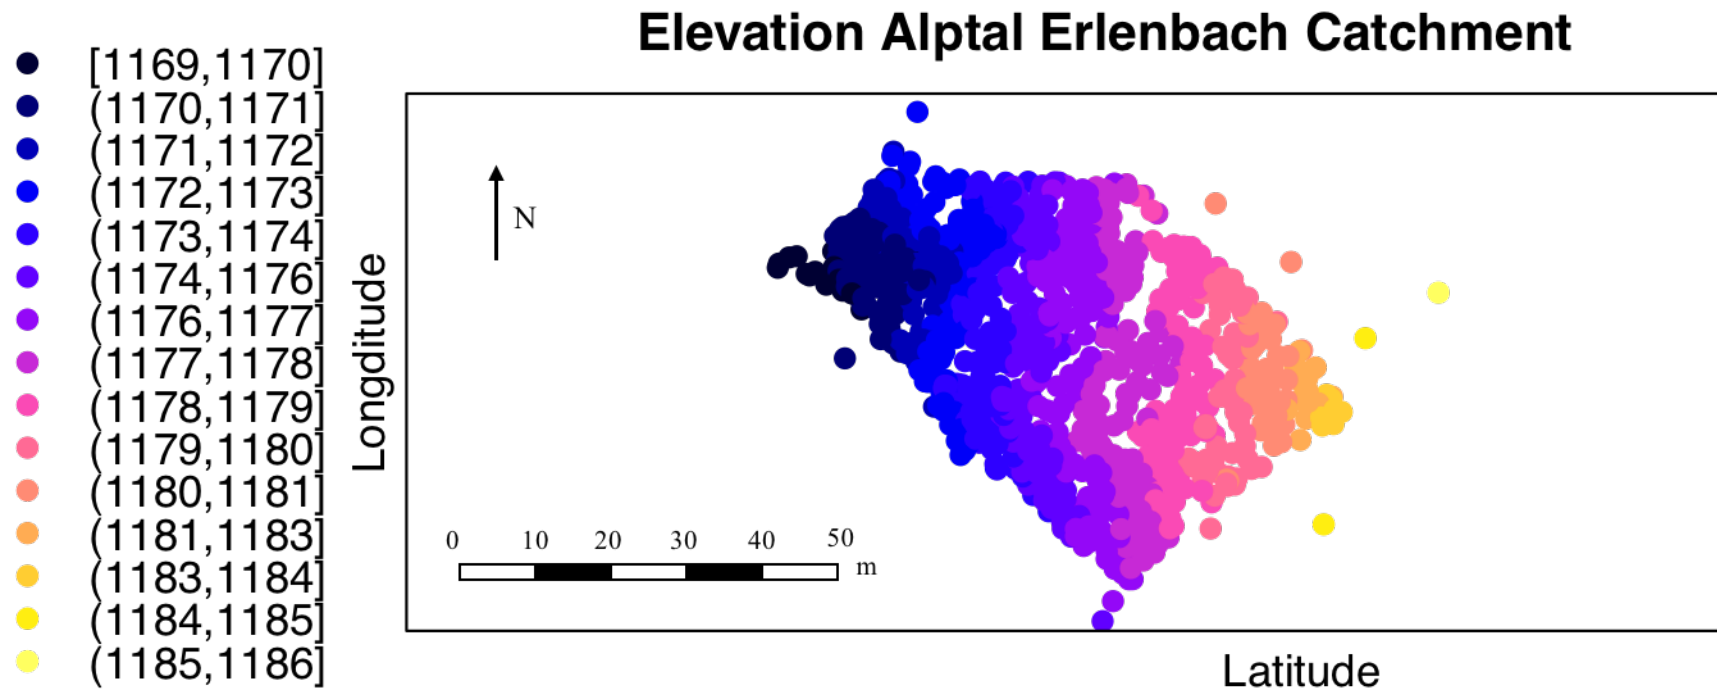

**Supplement Fig. S2.** Micro-topography in the Alptal NITREX in the site as determined by Digital Elevation Model (DEM). Empty spots indicate mounds with trees, all other elevation (m) is colour-coded. It is noticeable that despite the strong slope there is significant lateral micro-topographic differences. Courtesy of Patrick Schleppi, WSL.
